# Supplementary material for: Phospholipid synthesis fueled by lipid droplets drives the structural development of poliovirus replication organelles
Source: PubMed Central journal article supplement (PMC6128640; doi:10.1371/journal.ppat.1007280), 2018-08-27
Supplement: ppat.1007280.s003.pdf [file ppat.1007280.s003.pdf]

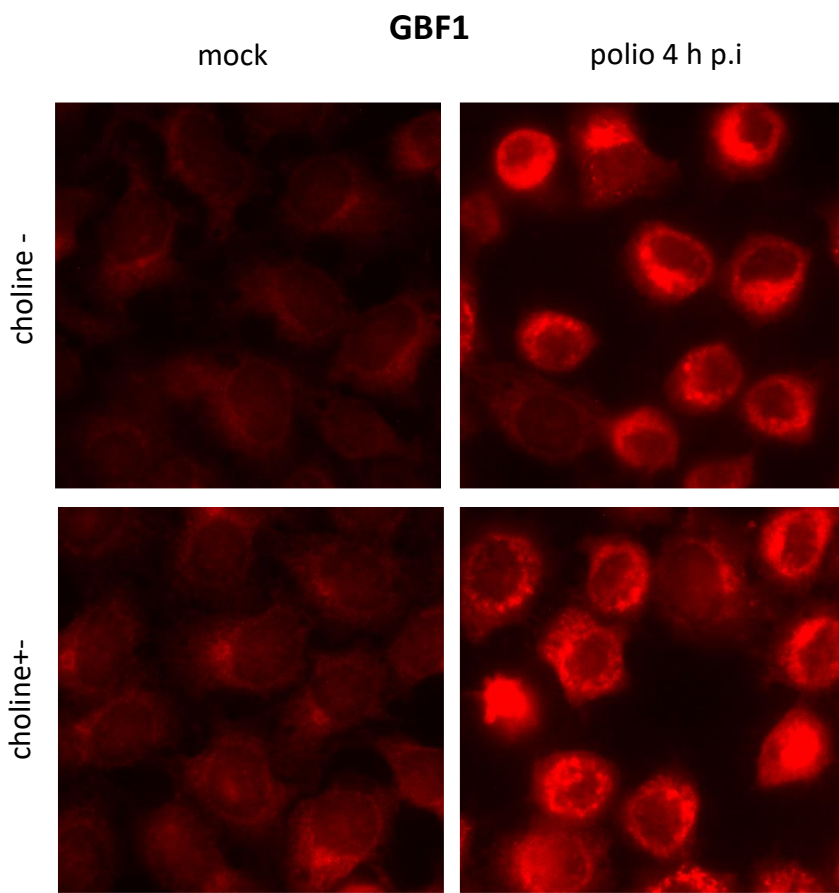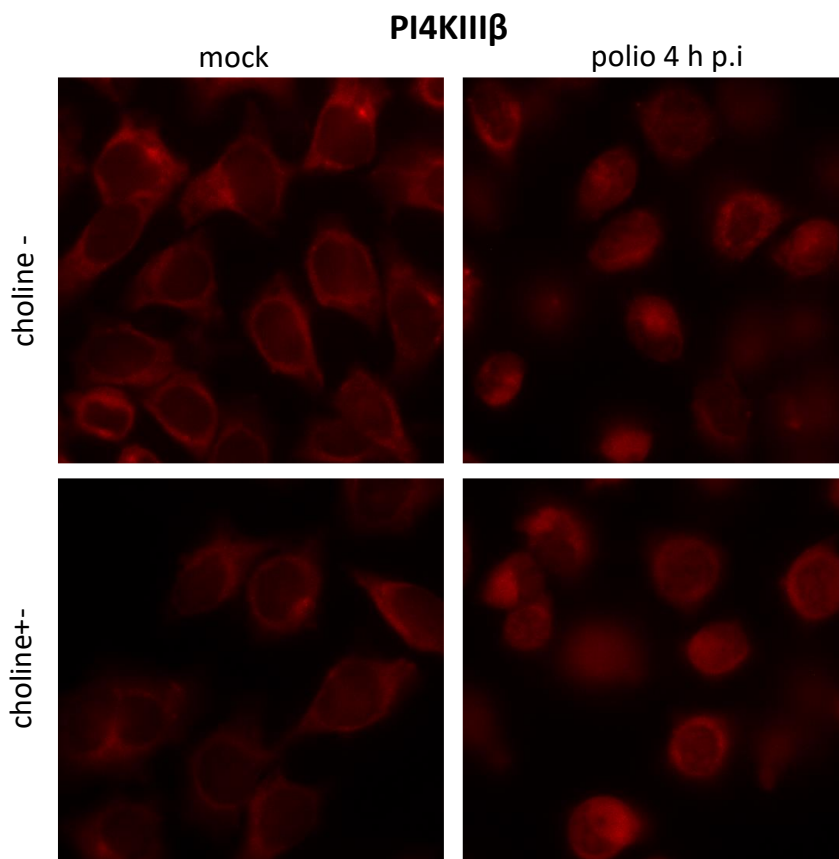

Supplementary figure 3
