# Supplementary material for: Phospholipid synthesis fueled by lipid droplets drives the structural development of poliovirus replication organelles
Source: PubMed Central journal article supplement (PMC6128640; doi:10.1371/journal.ppat.1007280), 2018-08-27
Supplement: ppat.1007280.s005.pdf [file ppat.1007280.s005.pdf]

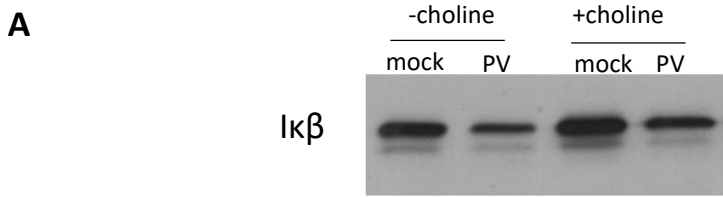

Degradation of I $\kappa$ B in infected cells does not depend on activation of membrane synthesis. HeLa cells were pre-incubated in choline-free medium for ~72h and were infected with poliovirus at an MOI of 10 PFU/cell and incubated in either a choline-free- or a choline-supplemented medium for 6 h.

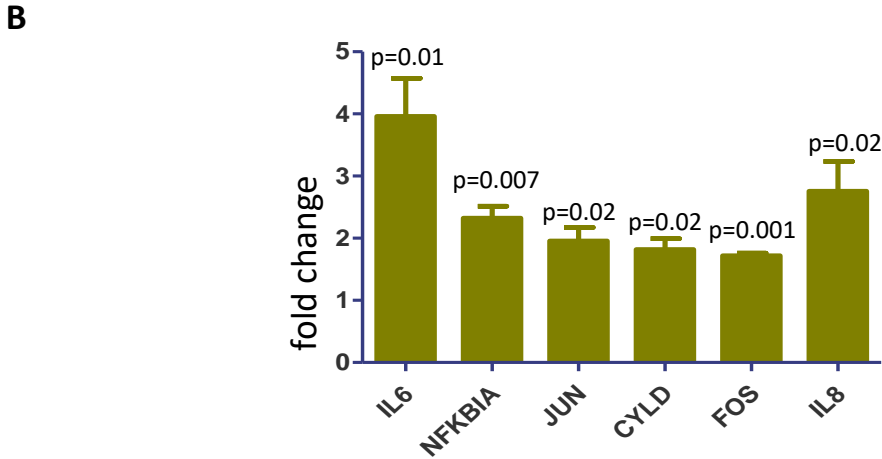

Genes with more than 1.5x activation of expression in infected cells with inhibited membrane synthesis. Results are from 2 independent experiments, p values (ch- vs ch+ for a corresponding sample) are shown.

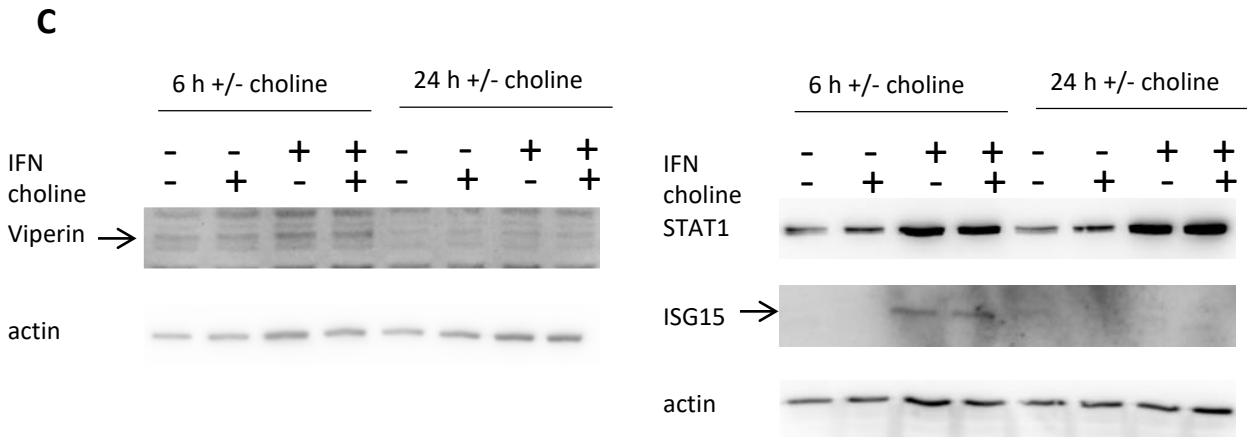

Interferon-stimulated genes are expressed similarly in non-infected cells in choline-free and choline-supplemented media. HeLa cells were incubated for 48 h without choline and then incubated overnight with 20 units of universal type 1 interferon also in choline-free medium. After that the IFN-containing medium was removed and the cells were incubated in either choline-free or choline-supplemented medium for additional 6 or 24h.
