# Supplementary material for: Phospholipid synthesis fueled by lipid droplets drives the structural development of poliovirus replication organelles
Source: PLoS Pathog. 2018 Aug 27;14(8):e1007280. doi: 10.1371/journal.ppat.1007280 (PMC6128640; doi:10.1371/journal.ppat.1007280)
Supplement: S6 Fig — HeLa cells were pre-incubated in choline-free medium for ~72 h and were infected with poliovirus at an MOI of 10 PFU/cell and incubated in either choline-free- or choline-supplemented medium after infection. At 6 h p.i., the cellular RNA was isolated and analyzed with a qPCR panel profiling 84 human genes involved in anti-viral response (Qiagen. (XLSX) [file ppat.1007280.s006.xlsx]

## Sheet: raw data CH-
A01	SYBR		Unkn		N/A	0	0
A02	SYBR		Unkn		N/A	0	0
A03	SYBR		Unkn		27.55	27.55	0
A04	SYBR		Unkn		26.5	26.5	0
A05	SYBR		Unkn		35.39	35.39	0
A06	SYBR		Unkn		29.14	29.14	0
A07	SYBR		Unkn		33.05	33.05	0
A08	SYBR		Unkn		28.51	28.51	0
A09	SYBR		Unkn		42.89	42.89	0
A10	SYBR		Unkn		32.96	32.96	0
A11	SYBR		Unkn		43.34	43.34	0
A12	SYBR		Unkn		38.08	38.08	0
B01	SYBR		Unkn		38.3	38.3	0
B02	SYBR		Unkn		29.14	29.14	0
B03	SYBR		Unkn		28.72	28.72	0
B04	SYBR		Unkn		25.09	25.09	0
B05	SYBR		Unkn		35.51	35.51	0
B06	SYBR		Unkn		35.02	35.02	0
B07	SYBR		Unkn		36.28	36.28	0
B08	SYBR		Unkn		32.47	32.47	0
B09	SYBR		Unkn		29.01	29.01	0
B10	SYBR		Unkn		28.76	28.76	0
B11	SYBR		Unkn		24.64	24.64	0
B12	SYBR		Unkn		30.89	30.89	0
C01	SYBR		Unkn		32.05	32.05	0
C02	SYBR		Unkn		28.18	28.18	0
C03	SYBR		Unkn		27.15	27.15	0
C04	SYBR		Unkn		23.15	23.15	0
C05	SYBR		Unkn		30.56	30.56	0
C06	SYBR		Unkn		36.27	36.27	0
C07	SYBR		Unkn		41.91	41.91	0
C08	SYBR		Unkn		27.07	27.07	0
C09	SYBR		Unkn		37.36	37.36	0
C10	SYBR		Unkn		28.88	28.88	0
C11	SYBR		Unkn		44.73	44.73	0
C12	SYBR		Unkn		42.7	42.7	0
D01	SYBR		Unkn		28.33	28.33	0
D02	SYBR		Unkn		26.75	26.75	0
D03	SYBR		Unkn		34.66	34.66	0
D04	SYBR		Unkn		30.22	30.22	0
D05	SYBR		Unkn		31.65	31.65	0
D06	SYBR		Unkn		26.88	26.88	0
D07	SYBR		Unkn		27.23	27.23	0
D08	SYBR		Unkn		36.34	36.34	0
D09	SYBR		Unkn		34.07	34.07	0
D10	SYBR		Unkn		29.65	29.65	0
D11	SYBR		Unkn		27.31	27.31	0
D12	SYBR		Unkn		27.43	27.43	0
E01	SYBR		Unkn		27.29	27.29	0
E02	SYBR		Unkn		28.89	28.89	0
E03	SYBR		Unkn		28.08	28.08	0
E04	SYBR		Unkn		26.03	26.03	0
E05	SYBR		Unkn		27.52	27.52	0
E06	SYBR		Unkn		29.14	29.14	0
E07	SYBR		Unkn		27.85	27.85	0
E08	SYBR		Unkn		29.57	29.57	0
E09	SYBR		Unkn		35.37	35.37	0
E10	SYBR		Unkn		33.33	33.33	0
E11	SYBR		Unkn		35.08	35.08	0
E12	SYBR		Unkn		28.41	28.41	0
F01	SYBR		Unkn		26.58	26.58	0
F02	SYBR		Unkn		N/A	0	0
F03	SYBR		Unkn		39.32	39.32	0
F04	SYBR		Unkn		37.77	37.77	0
F05	SYBR		Unkn		28.85	28.85	0
F06	SYBR		Unkn		37.23	37.23	0
F07	SYBR		Unkn		34.06	34.06	0
F08	SYBR		Unkn		35.38	35.38	0
F09	SYBR		Unkn		26.69	26.69	0
F10	SYBR		Unkn		28.4	28.4	0
F11	SYBR		Unkn		42.61	42.61	0
F12	SYBR		Unkn		28.06	28.06	0
G01	SYBR		Unkn		26.43	26.43	0
G02	SYBR		Unkn		28.1	28.1	0
G03	SYBR		Unkn		27.2	27.2	0
G04	SYBR		Unkn		31.15	31.15	0
G05	SYBR		Unkn		40.04	40.04	0
G06	SYBR		Unkn		N/A	0	0
G07	SYBR		Unkn		36.16	36.16	0
G08	SYBR		Unkn		33.79	33.79	0
G09	SYBR		Unkn		32.68	32.68	0
G10	SYBR		Unkn		28.26	28.26	0
G11	SYBR		Unkn		29.52	29.52	0
G12	SYBR		Unkn		26.02	26.02	0
H01	SYBR		Unkn		21.1	21.1	0
H02	SYBR		Unkn		N/A	0	0
H03	SYBR		Unkn		20.73	20.73	0
H04	SYBR		Unkn		26.49	26.49	0
H05	SYBR		Unkn		19.51	19.51	0
H06	SYBR		Unkn		42.07	42.07	0
H07	SYBR		Unkn		23.07	23.07	0
H08	SYBR		Unkn		23.12	23.12	0
H09	SYBR		Unkn		23.14	23.14	0
H10	SYBR		Unkn		21.35	21.35	0
H11	SYBR		Unkn		21.36	21.36	0
H12	SYBR		Unkn		21.63	21.63	0

## Sheet: Processed CH-
					∆CT = CTGOI – CTAVG HKG		UniGene	GenBank	Symbol
A01	SYBR		Unkn	N/A	#VALUE!	Absent in melanoma 2	Hs.281898	NM_004833	AIM2
A02	SYBR		Unkn	N/A	#VALUE!	Apolipoprotein B mRNA editing enzyme, catalytic polypeptide-like 3G	Hs.660143	NM_021822	APOBEC3G
A03	SYBR		Unkn	27.55	4.77667	ATG5 autophagy related 5 homolog (S. cerevisiae)	Hs.486063	NM_004849	ATG5
A04	SYBR		Unkn	26.5	3.72667	5-azacytidine induced 2	Hs.708030	NM_022461	AZI2
A05	SYBR		Unkn	N/A	#VALUE!	Caspase recruitment domain family, member 9	Hs.694071	NM_052813	CARD9
A06	SYBR		Unkn	29.14	6.36667	Caspase 1, apoptosis-related cysteine peptidase (interleukin 1, beta, convertase)	Hs.2490	NM_033292	CASP1
A07	SYBR		Unkn	33.05	10.2767	Caspase 10, apoptosis-related cysteine peptidase	Hs.5N/A3	NM_001230	CASP10
A08	SYBR		Unkn	28.51	5.73667	Caspase 8, apoptosis-related cysteine peptidase	Hs.599762	NM_001228	CASP8
A09	SYBR		Unkn	N/A	#VALUE!	Chemokine (C-C motif) ligand 3	Hs.514107	NM_002983	CCL3
A10	SYBR		Unkn	32.96	10.1867	Chemokine (C-C motif) ligand 5	Hs.514821	NM_002985	CCL5
A11	SYBR		Unkn	N/A	#VALUE!	CD40 molecule, TNF receptor superfamily member 5	Hs.472860	NM_001250	CD40
A12	SYBR		Unkn	N/A	#VALUE!	CD80 molecule	Hs.838	NM_005191	CD80
B01	SYBR		Unkn	N/A	#VALUE!	CD86 molecule	Hs.171182	NM_006889	CD86
B02	SYBR		Unkn	29.14	6.36667	Conserved helix-loop-helix ubiquitous kinase	Hs.198998	NM_001278	CHUK
B03	SYBR		Unkn	28.72	5.94667	Cathepsin B	Hs.520898	NM_001908	CTSB
B04	SYBR		Unkn	25.09	2.31667	Cathepsin L1	Hs.716407	NM_001912	CTSL1
B05	SYBR		Unkn	N/A	#VALUE!	Cathepsin S	Hs.181301	NM_004079	CTSS
B06	SYBR		Unkn	N/A	#VALUE!	Chemokine (C-X-C motif) ligand 10	Hs.632586	NM_001565	CXCL10
B07	SYBR		Unkn	N/A	#VALUE!	Chemokine (C-X-C motif) ligand 11	Hs.632592	NM_005409	CXCL11
B08	SYBR		Unkn	32.47	9.69667	Chemokine (C-X-C motif) ligand 9	Hs.77367	NM_002416	CXCL9
B09	SYBR		Unkn	29.01	6.23667	Cylindromatosis (turban tumor syndrome)	Hs.578973	NM_015247	CYLD
B10	SYBR		Unkn	28.76	5.98667	Dihydroxyacetone kinase 2 homolog (S. cerevisiae)	Hs.6278	NM_015533	DAK
B11	SYBR		Unkn	24.64	1.86667	DEAD (Asp-Glu-Ala-Asp) box polypeptide 3, X-linked	Hs.380774	NM_001N/A6	DDX3X
B12	SYBR		Unkn	30.89	8.11667	DEAD (Asp-Glu-Ala-Asp) box polypeptide 58	Hs.190622	NM_014314	DDX58
C01	SYBR		Unkn	32.05	9.27667	DEXH (Asp-Glu-X-His) box polypeptide 58	Hs.55918	NM_024119	DHX58
C02	SYBR		Unkn	28.18	5.40667	Fas (TNFRSF6)-associated via death domain	Hs.86131	NM_003824	FADD
C03	SYBR		Unkn	27.15	4.37667	FBJ murine osteosarcoma viral oncogene homolog	Hs.728789	NM_005252	FOS
C04	SYBR		Unkn	23.15	0.37667	Heat shock protein 90kDa alpha (cytosolic), class A member 1	Hs.525600	NM_001017963	HSP90AA1
C05	SYBR		Unkn	30.56	7.78667	Interferon induced with helicase C domain 1	Hs.163173	NM_022168	IFIH1
C06	SYBR		Unkn	N/A	#VALUE!	Interferon, alpha 1	Hs.37026	NM_024013	IFNA1
C07	SYBR		Unkn	N/A	#VALUE!	Interferon, alpha 2	Hs.211575	NM_000605	IFNA2
C08	SYBR		Unkn	27.07	4.29667	Interferon (alpha, beta and omega) receptor 1	Hs.529400	NM_000629	IFNAR1
C09	SYBR		Unkn	N/A	#VALUE!	Interferon, beta 1, fibroblast	Hs.93177	NM_002176	IFNB1
C10	SYBR		Unkn	28.88	6.10667	Inhibitor of kappa light polypeptide gene enhancer in B-cells, kinase beta	Hs.597664	NM_001556	IKBKB
C11	SYBR		Unkn	N/A	#VALUE!	Interleukin 12A (natural killer cell stimulatory factor 1, cytotoxic lymphocyte maturation factor 1, pN/A)	Hs.673	NM_000882	IL12A
C12	SYBR		Unkn	N/A	#VALUE!	Interleukin 12B (natural killer cell stimulatory factor 2, cytotoxic lymphocyte maturation factor 2, p40)	Hs.674	NM_002187	IL12B
D01	SYBR		Unkn	28.33	5.55667	Interleukin 15	Hs.654378	NM_000585	IL15
D02	SYBR		Unkn	26.75	3.97667	Interleukin 18 (interferon-gamma-inducing factor)	Hs.83077	NM_001562	IL18
D03	SYBR		Unkn	34.66	11.8867	Interleukin 1, beta	Hs.126256	NM_000576	IL1B
D04	SYBR		Unkn	30.22	7.44667	Interleukin 6 (interferon, beta 2)	Hs.654458	NM_000600	IL6
D05	SYBR		Unkn	31.65	8.87667	Interleukin 8	Hs.624	NM_000584	IL8
D06	SYBR		Unkn	26.88	4.10667	Interleukin-1 receptor-associated kinase 1	Hs.522819	NM_001569	IRAK1
D07	SYBR		Unkn	27.23	4.45667	Interferon regulatory factor 3	Hs.75254	NM_001571	IRF3
D08	SYBR		Unkn	N/A	#VALUE!	Interferon regulatory factor 5	Hs.521181	NM_001098629	IRF5
D09	SYBR		Unkn	34.07	11.2967	Interferon regulatory factor 7	Hs.166120	NM_001572	IRF7
D10	SYBR		Unkn	29.65	6.87667	ISG15 ubiquitin-like modifier	Hs.458485	NM_005101	ISG15
D11	SYBR		Unkn	27.31	4.53667	Jun proto-oncogene	Hs.714791	NM_002228	JUN
D12	SYBR		Unkn	27.43	4.65667	Mitogen-activated protein kinase kinase 1	Hs.145442	NM_002755	MAP2K1
E01	SYBR		Unkn	27.29	4.51667	Mitogen-activated protein kinase kinase 3	Hs.514012	NM_002756	MAP2K3
E02	SYBR		Unkn	28.89	6.11667	Mitogen-activated protein kinase kinase kinase 1	Hs.657756	NM_005921	MAP3K1
E03	SYBR		Unkn	28.08	5.30667	Mitogen-activated protein kinase kinase kinase 7	Hs.644143	NM_003188	MAP3K7
E04	SYBR		Unkn	26.03	3.25667	Mitogen-activated protein kinase 1	Hs.431850	NM_002745	MAPK1
E05	SYBR		Unkn	27.52	4.74667	Mitogen-activated protein kinase 14	Hs.485233	NM_001315	MAPK14
E06	SYBR		Unkn	29.14	6.36667	Mitogen-activated protein kinase 3	Hs.861	NM_002746	MAPK3
E07	SYBR		Unkn	27.85	5.07667	Mitogen-activated protein kinase 8	Hs.138211	NM_002750	MAPK8
E08	SYBR		Unkn	29.57	6.79667	Mitochondrial antiviral signaling protein	Hs.570362	NM_020746	MAVS
E09	SYBR		Unkn	N/A	#VALUE!	Mediterranean fever	Hs.632221	NM_000243	MEFV
E10	SYBR		Unkn	33.33	10.5567	Myxovirus (influenza virus) resistance 1, interferon-inducible protein p78 (mouse)	Hs.517307	NM_002462	MX1	negatives
E11	SYBR		Unkn	N/A	#VALUE!	Myeloid differentiation primary response gene (88)	Hs.82116	NM_002468	MYD88
E12	SYBR		Unkn	28.41	5.63667	Nuclear factor of kappa light polypeptide gene enhancer in B-cells 1	Hs.654408	NM_003998	NFKB1
F01	SYBR		Unkn	26.58	3.80667	Nuclear factor of kappa light polypeptide gene enhancer in B-cells inhibitor, alpha	Hs.81328	NM_020529	NFKBIA
F02	SYBR		Unkn	N/A	#VALUE!	NLR family, pyrin domain containing 3	Hs.159483	NM_183395	NLRP3
F03	SYBR		Unkn	N/A	#VALUE!	Nucleotide-binding oligomerization domain containing 2	Hs.592072	NM_022162	NOD2
F04	SYBR		Unkn	N/A	#VALUE!	2'-5'-oligoadenylate synthetase 2, 69/71kDa	Hs.414332	NM_0025N/A	OAS2
F05	SYBR		Unkn	28.85	6.07667	Peptidylprolyl cis/trans isomerase, NIMA-interacting 1	Hs.465849	NM_006221	PIN1
F06	SYBR		Unkn	N/A	#VALUE!	Proline-serine-threonine phosphatase interacting protein 1	Hs.129758	NM_003978	PSTPIP1
F07	SYBR		Unkn	34.06	11.2867	PYD and CARD domain containing	Hs.499094	NM_013258	PYCARD
F08	SYBR		Unkn	N/A	#VALUE!	PYD (pyrin domain) containing 1	Hs.58314	NM_152901	PYDC1
F09	SYBR		Unkn	26.69	3.91667	V-rel reticuloendotheliosis viral oncogene homolog A (avian)	Hs.502875	NM_021975	RELA
F10	SYBR		Unkn	28.4	5.62667	Receptor (TNFRSF)-interacting serine-threonine kinase 1	Hs.519842	NM_003804	RIPK1
F11	SYBR		Unkn	N/A	#VALUE!	Secreted phosphoprotein 1	Hs.313	NM_000582	SPP1
F12	SYBR		Unkn	28.06	5.28667	Signal transducer and activator of transcription 1, 91kDa	Hs.642990	NM_007315	STAT1
G01	SYBR		Unkn	26.43	3.65667	SGT1, suppressor of G2 allele of SKP1 (S. cerevisiae)	Hs.281902	NM_006704	SUGT1
G02	SYBR		Unkn	28.1	5.32667	TANK-binding kinase 1	Hs.505874	NM_013254	TBK1
G03	SYBR		Unkn	27.2	4.42667	Toll-like receptor adaptor molecule 1	Hs.29344	NM_182919	TICAM1
G04	SYBR		Unkn	31.15	8.37667	Toll-like receptor 3	Hs.657724	NM_003265	TLR3
G05	SYBR		Unkn	N/A	#VALUE!	Toll-like receptor 7	Hs.659215	NM_016562	TLR7
G06	SYBR		Unkn	N/A	#VALUE!	Toll-like receptor 8	Hs.660543	NM_138636	TLR8
G07	SYBR		Unkn	N/A	#VALUE!	Toll-like receptor 9	Hs.87968	NM_017442	TLR9
G08	SYBR		Unkn	33.79	11.0167	Tumor necrosis factor	Hs.241570	NM_000594	TNF
G09	SYBR		Unkn	32.68	9.90667	TNFRSF1A-associated via death domain	Hs.460996	NM_003789	TRADD
G10	SYBR		Unkn	28.26	5.48667	TNF receptor-associated factor 3	Hs.510528	NM_003300	TRAF3
G11	SYBR		Unkn	29.52	6.74667	TNF receptor-associated factor 6	Hs.591983	NM_004620	TRAF6
G12	SYBR		Unkn	26.02	3.24667	Tripartite motif containing 25	Hs.528952	NM_005082	TRIM25	AVG Ct bouskeeping (Act, GAPDH, Hyp)
H01	SYBR		Unkn	21.1		Actin, beta	Hs.520640	NM_001101	ACTB	22.7733
H02	SYBR		Unkn	35		Beta-2-microglobulin	Hs.534255	NM_004048	B2M
H03	SYBR		Unkn	20.73		Glyceraldehyde-3-phosphate dehydrogenase	Hs.592355	NM_002046	GAPDH
H04	SYBR		Unkn	26.49		Hypoxanthine phosphoribosyltransferase 1	Hs.412707	NM_000194	HPRT1
H05	SYBR		Unkn	19.51		Ribosomal protein, large, P0	Hs.546285	NM_001002	RPLP0
H06	SYBR		Unkn	N/A		Human Genomic DNA Contamination	N/A	SA_00105	HGDC	D(RTCcontrols-PCR controls)<5
H07	SYBR		Unkn	23.07		Reverse Transcription Control	N/A	SA_00104	RTC	1.66333
H08	SYBR		Unkn	23.12		Reverse Transcription Control	N/A	SA_00104	RTC
H09	SYBR		Unkn	23.14		Reverse Transcription Control	N/A	SA_00104	RTC	AVG PCR controls=20+-2
H10	SYBR		Unkn	21.35		Positive PCR Control	N/A	SA_00103	PPC	21.4467
H11	SYBR		Unkn	21.36		Positive PCR Control	N/A	SA_00103	PPC
H12	SYBR		Unkn	21.63		Positive PCR Control	N/A	SA_00103	PPC

## Sheet: DD CT(CH-)-CT(CH+)
UniGene	GenBank	Symbol	ΔCT CH-	ΔCT CH+	ΔΔ CT (CH-)-CH+	fold change 2-ΔΔCT
Hs.654458	NM_000600	IL6	7.44667	9.21	-1.76333	3.39481	Interleukin 6 (interferon, beta 2)
Hs.81328	NM_020529	NFKBIA	3.80667	5.13	-1.32333	2.50243	Nuclear factor of kappa light polypeptide gene enhancer in B-cells inhibitor, alpha
Hs.714791	NM_002228	JUN	4.53667	5.75	-1.21333	2.31872	Jun proto-oncogene
Hs.578973	NM_015247	CYLD	6.23667	7.13	-0.89333	1.85746	Cylindromatosis (turban tumor syndrome)
Hs.728789	NM_005252	FOS	4.37667	5.23	-0.85333	1.80667	FBJ murine osteosarcoma viral oncogene homolog
Hs.654378	NM_000585	IL15	5.55667	6.34	-0.78333	1.7211	Interleukin 15
Hs.624	NM_000584	IL8	8.87667	9.66	-0.78333	1.7211	Interleukin 8
Hs.502875	NM_021975	RELA	3.91667	4.48	-0.56333	1.47768	V-rel reticuloendotheliosis viral oncogene homolog A (avian)
Hs.138211	NM_002750	MAPK8	5.07667	5.59	-0.51333	1.42734	Mitogen-activated protein kinase 8
Hs.591983	NM_004620	TRAF6	6.74667	7.25	-0.50333	1.41748	TNF receptor-associated factor 6
Hs.55918	NM_024119	DHX58	9.27667	9.77	-0.49333	1.40769	DEXH (Asp-Glu-X-His) box polypeptide 58
Hs.654408	NM_003998	NFKB1	5.63667	6.12	-0.48333	1.39797	Nuclear factor of kappa light polypeptide gene enhancer in B-cells 1
Hs.519842	NM_003804	RIPK1	5.62667	6.09	-0.46333	1.37872	Receptor (TNFRSF)-interacting serine-threonine kinase 1
Hs.126256	NM_000576	IL1B	11.8867	12.29	-0.40333	1.32256	Interleukin 1, beta
Hs.597664	NM_001556	IKBKB	6.10667	6.47	-0.36333	1.28639	Inhibitor of kappa light polypeptide gene enhancer in B-cells, kinase beta
Hs.708030	NM_022461	AZI2	3.72667	4.07	-0.34333	1.26868	5-azacytidine induced 2
Hs.522819	NM_001569	IRAK1	4.10667	4.45	-0.34333	1.26868	Interleukin-1 receptor-associated kinase 1
Hs.657756	NM_005921	MAP3K1	6.11667	6.46	-0.34333	1.26868	Mitogen-activated protein kinase kinase kinase 1
Hs.657724	NM_003265	TLR3	8.37667	8.71	-0.33333	1.25992	Toll-like receptor 3
Hs.83077	NM_001562	IL18	3.97667	4.3	-0.32333	1.25122	Interleukin 18 (interferon-gamma-inducing factor)
Hs.6278	NM_015533	DAK	5.98667	6.3	-0.31333	1.24257	Dihydroxyacetone kinase 2 homolog (S. cerevisiae)
Hs.75254	NM_001571	IRF3	4.45667	4.77	-0.31333	1.24257	Interferon regulatory factor 3
Hs.166120	NM_001572	IRF7	11.2967	11.61	-0.31333	1.24257	Interferon regulatory factor 7
Hs.505874	NM_013254	TBK1	5.32667	5.64	-0.31333	1.24257	TANK-binding kinase 1
Hs.145442	NM_002755	MAP2K1	4.65667	4.94	-0.28333	1.217	Mitogen-activated protein kinase kinase 1
Hs.514821	NM_002985	CCL5	10.1867	10.47	-0.28333	1.217	Chemokine (C-C motif) ligand 5
Hs.510528	NM_003300	TRAF3	5.48667	5.77	-0.28333	1.217	TNF receptor-associated factor 3
Hs.29344	NM_182919	TICAM1	4.42667	4.7	-0.27333	1.20859	Toll-like receptor adaptor molecule 1
Hs.431850	NM_002745	MAPK1	3.25667	3.51	-0.25333	1.19196	Mitogen-activated protein kinase 1
Hs.86131	NM_003824	FADD	5.40667	5.65	-0.24333	1.18372	Fas (TNFRSF6)-associated via death domain
Hs.529400	NM_000629	IFNAR1	4.29667	4.54	-0.24333	1.18372	Interferon (alpha, beta and omega) receptor 1
Hs.514012	NM_002756	MAP2K3	4.51667	4.73	-0.21333	1.15936	Mitogen-activated protein kinase kinase 3
Hs.380774	NM_001356	DDX3X	1.86667	2.05	-0.18333	1.1355	DEAD (Asp-Glu-Ala-Asp) box polypeptide 3, X-linked
Hs.281902	NM_006704	SUGT1	3.65667	3.83	-0.17333	1.12766	SGT1, suppressor of G2 allele of SKP1 (S. cerevisiae)
Hs.528952	NM_005082	TRIM25	3.24667	3.38	-0.13333	1.09682	Tripartite motif containing 25
Hs.460996	NM_003789	TRADD	9.90667	10.02	-0.11333	1.08172	TNFRSF1A-associated via death domain
Hs.485233	NM_001315	MAPK14	4.74667	4.83	-0.08333	1.05946	Mitogen-activated protein kinase 14
Hs.2490	NM_033292	CASP1	6.36667	6.44	-0.07333	1.05214	Caspase 1, apoptosis-related cysteine peptidase (interleukin 1, beta, convertase)
Hs.644143	NM_003188	MAP3K7	5.30667	5.38	-0.07333	1.05214	Mitogen-activated protein kinase kinase kinase 7
Hs.520898	NM_001908	CTSB	5.94667	6.01	-0.06333	1.04487	Cathepsin B
Hs.716407	NM_001912	CTSL1	2.31667	2.38	-0.06333	1.04487	Cathepsin L1
Hs.599762	NM_001228	CASP8	5.73667	5.76	-0.02333	1.0163	Caspase 8, apoptosis-related cysteine peptidase
Hs.570362	NM_020746	MAVS	6.79667	6.81	-0.01333	1.00928	Mitochondrial antiviral signaling protein
Hs.486063	NM_004849	ATG5	4.77667	4.77	0.00667	0.995387	ATG5 autophagy related 5 homolog (S. cerevisiae)
Hs.642990	NM_007315	STAT1	5.28667	5.26	0.02667	0.981684	Signal transducer and activator of transcription 1, 91kDa
Hs.465849	NM_006221	PIN1	6.07667	6.05	0.02667	0.981684	Peptidylprolyl cis/trans isomerase, NIMA-interacting 1
Hs.163173	NM_022168	IFIH1	7.78667	7.74	0.04667	0.968168	Interferon induced with helicase C domain 1
Hs.190622	NM_014314	DDX58	8.11667	7.9	0.21667	0.860549	DEAD (Asp-Glu-Ala-Asp) box polypeptide 58
Hs.861	NM_002746	MAPK3	6.36667	6.13	0.23667	0.848702	Mitogen-activated protein kinase 3
Hs.458485	NM_005101	ISG15	6.87667	6.62	0.25667	0.837018	ISG15 ubiquitin-like modifier
Hs.198998	NM_001278	CHUK	6.36667	6.11	0.25667	0.837018	Conserved helix-loop-helix ubiquitous kinase
Hs.525600	NM_001017963	HSP90AA1	0.37667	0.01	0.36667	0.775571	Heat shock protein 90kDa alpha (cytosolic), class A member 1
Hs.517307	NM_002462	MX1	10.5567	10.12	0.43667	0.738838	Myxovirus (influenza virus) resistance 1, interferon-inducible protein p78 (mouse)
Hs.77367	NM_002416	CXCL9	9.69667	8.84	0.85667	0.552226	Chemokine (C-X-C motif) ligand 9
Hs.5353	NM_001230	CASP10	10.2767	9.29	0.98667	0.504641	Caspase 10, apoptosis-related cysteine peptidase
